# Supplementary material
Source: publisher figshare collection journal article supplement (https://rs.figshare.com/ndownloader/files/14726774)
Supplement: Supplementary file [file 14726774]

Proceedings of the Royal Society B

The supplementary material for

**Male density, a signal for population self-regulation in**  
*Alligator sinensis*

DOI: 10.1098/rspb.2019.0191

Lan ZHAO<sup>1</sup>, Li-Ming FANG<sup>2</sup>, Qiu-Hong WAN<sup>1</sup>, & Sheng-Guo Fang<sup>1, \*</sup>

<sup>1</sup> MOE Key Laboratory of Biosystems Homeostasis & Protection, State Conservation

Center for Gene Resources of Endangered Wildlife, College of Life Sciences,

Zhejiang University, Hangzhou 310058, China

<sup>2</sup> Changxing Chinese Alligator Nature Reserve, Changxing 313100, China

Correspondence and requests for materials should be addressed to

[sgfanglab@zju.edu.cn](mailto:sgfanglab@zju.edu.cn)

## **Supplementary methods S1**

***Number count.*** Initially, the population size was small, and the staff could count the alligators during their daily feeding. The feeding season lasts from May to October every year. Once the population reached 200–300 individuals, counting in this way became difficult. The Chinese alligator has become a national-level protected animal; therefore, the nature reserve staff captured the alligators to confirm the number and sex every spring so that they can report the data to State Forestry Bureau of China.

***Incubation.*** Eggs were collected every year from the alligator nests after 50 days of incubation, i.e. ~1 week before hatching. Eggs were incubated in artificial hatchery rooms. During the egg collection, the number of nests and the total number of eggs were recorded, and the number of hatchlings were recorded after hatching. The fertilisation status was examined in the nests in which all egg remained unhatched. Hatchlings were raised to survive the first winter and sexed.

***Identification of fertilised eggs.*** Egg candler were used to determine the fertilisation of eggs, whereby light was shone on the eggs in a dark environment. The opaque banding on the shell would be observed if the egg was fertilised [1], and infertile eggs would be translucent [2].

***Sexual identification.*** The sex of adults and sub-adults was determined by examining the cloaca for the presence of a penis. In male adults, the penis was determined by touch by moving the finger from side to side along the ventral floor of the cloaca [3,

4]. The sex identification of hatchlings was conducted following the methods initially used for *Crocodylus johnstoni* and *C. porosus*. This involved inserting fine curved forceps into the cloaca and spreading them to view the clitero-penis. In females this was defined as “sharp” and “small”, while in males it was defined as “tubular” and “large” [5]. The sexing of hatchlings was usually conducted when they reached three months old. Before 1996, the hatchlings were released into a small part of a pond in the original habitat and protected, and the juveniles and the founders all coexisted in the same pond. It was difficult to distinguish the size of the clitero-penis in hatchlings raised to 4–5 years old in the original habitat (> 30 cm snout-vent length), i.e. to reconfirm their sex and then release back into the pool. After 1996, the sex of hatchlings was identified at 2–3 months old with reference to the identification methods used for *A. mississippiensis*. This method involved determining the colour of the clitero-penis, an important character for sexing alligators. The male clitero-penis is typically red, round, and large in comparison to the female organ, which is white, sharper, and smaller [6]. After sex identification, the alligators were released into the same pool as their mothers.

**Age identification.** Male and female Chinese alligators mature at 10 and 11 years old, respectively. Juveniles were mainly categorised by age. If the age was unclear, the body length (i.e. total length) was assessed and used to identify the age. The distinguishing standards used were as follows:

Hatchlings-yearlings:  $\leq$  2 years-old, body length  $\leq$  30 cm;

Juveniles: males = 3–6 years old or females = 3–7 years old, body length = 31–120 cm;

Sub-adult: males = 7–9 years old or females = 8–10 years old, body length = 121–150 cm;

Adult: males  $\geq$  10 years old; females  $\geq$  11 years old, body length  $\geq$  151 cm.

Originally, the age structure data were not recorded each year for each area. However, the selection criteria of individuals removed to the new areas was explicit, and the number and age of dead individuals were also recorded. The selective order of founders in the C1–C6 area was: large offspring > small offspring > founders of the original area. In each age group, half of the offspring were left behind in the original habitat and the other half were moved to the new area in age order, i.e. from old to young. If more than half the individuals were removed, then the older offspring were selected first and then the younger offspring. The founders in the original area were considered last. The age structure of areas C and C1 were calculated for every year and the data are presented in Table S2. However, this age structure is not precise. It was difficult to determine the age structure in areas C2, C3, C4, C5, and C6 to a high degree of accuracy because they should be based on the age structure of areas C1 and C2. Therefore, the age structure data of areas C2–C6 are absent.

***Data selection.*** A destructive snow and ice disaster occurred in 2008 which led to the death of 1184 alligators. To avoid another such disaster, the reserve changed its management protocol after 2011. In 2011, areas C–C6 were divided into 18 new

habitats in succession and all the hatchlings were moved to a greenhouse to overwinter, and then released into separate pools where they were protected during the following spring. These juveniles were moved to a reintroduction area when they were 6 years of age. Owing to this artificial control, we mainly analysed the data before 2011.

## Supplementary references

1. Grahame J.W.W., Manolis S.C., Whitehead P.J., Dempsey K. 1987 The Possible Relationship between Embryo Orientation Opaque Banding and the Dehydration of Albumen in Crocodile Eggs. *Copeia* **1987**(1), 252-257. (doi:10.2307/1446070).
2. Chen B., Hua T., Wu X., Wang C. 2003 Research on the Chinese alligator (In Chinese). Shanghai Scientific and Technological Education, Shanghai, pp.312-313.
3. Bradt G.W. 1938 A study of beaver colonies in Michigan. *Journal of Mammalogy* **19**(2), 139-162. (doi:10.2307/1374609)
4. Chabreck R.H. 1963 Methods of capturing, marking and sexing alligators. In *Proceedings of the Annual Conference of the Southeastern Association of Game and Fish Commissioners*, pp. 47-50. (doi:10.1007/978-1-349-03711-7\_2)
5. Webb G., Manolis S.C., Sack G.C. 1984 Technical Note: Cloacal Sexual of Hatchling Crocodiles. *Wildlife Research* **11**(1), 201-202. (doi:10.1071/WR9840201).
6. Allsteadt J., Lang J.W. 1995 Sexual Dimorphism in the Genital Morphology of Young American Alligators, *Alligator mississippiensis*. *Herpetologica* **51**(3), 314-325. (doi:10.1016/0162-3095(95)90001-2).



|      |                                              |                                                                        |     |    |     |    |     |     |     |    |     |                                   |    |     |
|------|----------------------------------------------|------------------------------------------------------------------------|-----|----|-----|----|-----|-----|-----|----|-----|-----------------------------------|----|-----|
| 1994 |                                              |                                                                        | 242 | 45 | 197 | 3  | 57  | 0   | 0   | 0  | 0   | 2♀ (Fight for nest site and died) | 0  | 0   |
| 1995 |                                              |                                                                        | 241 | 45 | 196 | 1  | 14  | 0   | 0   | 0  | 0   | 1♀ (Fight for nest site and died) | 0  | 0   |
| 1996 |                                              |                                                                        | 241 | 45 | 196 | 0  | 0   | 0   | 0   | 0  | 0   | 0                                 | 0  | 0   |
| 1997 | 81 individuals (14♂67♀) were remove to C1    |                                                                        | 160 | 31 | 129 | 11 | 151 | 104 | 83  | 15 | 68  | 0                                 | 15 | 68  |
| 1998 |                                              |                                                                        | 243 | 46 | 197 | 11 | 131 | 0   | 0   | 0  | 0   | 0                                 | 0  | 0   |
| 1999 |                                              |                                                                        | 243 | 46 | 197 | 2  | 27  | 0   | 0   | 0  | 0   | 0                                 | 0  | 0   |
| 2000 |                                              |                                                                        | 243 | 46 | 197 | 1  | 7   | 0   | 0   | 0  | 0   | 0                                 | 0  | 0   |
| 2001 | 80 individuals ( 15♂65♀) were remove to C2   |                                                                        | 163 | 31 | 132 | 14 | 291 | 163 | 74  | 13 | 61  | 0                                 | 13 | 61  |
| 2002 |                                              |                                                                        | 237 | 44 | 193 | 0  | 0   | 0   | 0   | 0  | 0   | 0                                 | 0  | 0   |
| 2003 | 162 individuals ( 30♂132♀) were remove to C3 | 13 mature individuals ( 6♂7♀) were introduce from Anhui nature reserve | 75  | 14 | 61  | 13 | 258 | 209 | 172 | 31 | 141 | 0                                 | 31 | 141 |
| 2004 |                                              |                                                                        | 247 | 45 | 202 | 2  | 12  | 0   | 0   | 0  | 0   | 0                                 | 0  | 0   |
| 2005 |                                              |                                                                        | 247 | 45 | 202 | 4  | 81  | 0   | 0   | 0  | 0   | 0                                 | 0  | 0   |
| 2006 | 83 individuals ( 15♂68♀) were remove to C6   |                                                                        | 164 | 30 | 134 | 14 | 272 | 168 | 97  | 16 | 81  | 0                                 | NC | NC  |
| 2007 |                                              |                                                                        | 261 | 46 | 215 | 5  | 47  | 0   | 0   | 0  | 0   | 3♀ born in 2006                   | 0  | 0   |
| 2008 |                                              |                                                                        | 258 | 46 | 212 | 1  | 8   | 0   | 0   | 0  | 0   | 0                                 | 0  | 0   |
| 2009 |                                              |                                                                        | 258 | 46 | 212 | 0  | 0   | 0   | 0   | 0  | 0   | 0                                 | 0  | 0   |
| 2010 | 80 individuals ( 20♂60♀) were remove to C6   |                                                                        | 178 | 26 | 152 | 10 | 194 | 127 | 111 | 19 | 92  | 0                                 | 19 | 92  |
| 2011 |                                              |                                                                        | 289 | 45 | 244 | 3  | 29  | 0   | 0   | 0  | 0   | 0                                 | 0  | 0   |
| 1997 |                                              | 14♂67♀ were remove from area C                                         | 81  | 14 | 67  | 5  | 107 | 69  | 54  | 33 | 21  | 0                                 | 33 | 21  |
| 1998 |                                              |                                                                        | 135 | 47 | 88  | 4  | 81  | 64  | 42  | 23 | 19  | 0                                 | 23 | 19  |
| 1999 |                                              |                                                                        | 177 | 70 | 107 | 7  | 128 | 0   | 0   | 0  | 0   | 0                                 | 0  | 0   |
| 2000 |                                              |                                                                        | 177 | 70 | 107 | 0  | 0   | 0   | 0   | 0  | 0   | 0                                 | 0  | 0   |
| 2001 | 80 individuals ( 15♂65♀) were remove to C2   |                                                                        | 97  | 55 | 42  | 5  | 44  | 36  | 23  | 14 | 9   | 0                                 | 14 | 9   |
| 2002 |                                              |                                                                        | 120 | 69 | 51  | 0  | 0   | 0   | 0   | 0  | 0   | 0                                 | 0  | 0   |
| 2003 | 64 individuals (39♂25♀) were remove to C4    | 13 mature individuals ( 6♂7♀) were introduce from Anhui nature reserve | 69  | 36 | 33  | 10 | 174 | 111 | 75  | 33 | 42  | 0                                 | 33 | 42  |
| 2004 |                                              |                                                                        | 144 | 69 | 75  | 4  | 52  | 0   | 0   | 0  | 0   | 0                                 | 0  | 0   |
| 2005 |                                              |                                                                        | 144 | 69 | 75  | 3  | 52  | 0   | 0   | 0  | 0   | 0                                 | 0  | 0   |

C1



|      |      |                                                                                                                         |     |     |     |    |     |     |     |    |     |                   |    |    |
|------|------|-------------------------------------------------------------------------------------------------------------------------|-----|-----|-----|----|-----|-----|-----|----|-----|-------------------|----|----|
|      | 2006 | 29 individuals (29♂) were remove to C6                                                                                  | 115 | 40  | 75  | 13 | 255 | 193 | 170 | 28 | 142 | 0                 | NC | NC |
|      | 2007 |                                                                                                                         | 285 | 68  | 217 | 6  | 48  | 0   | 0   | 0  | 0   | 0                 | 0  | 0  |
|      | 2008 |                                                                                                                         | 285 | 68  | 217 | 2  | 5   | 0   | 0   | 0  | 0   | 0                 | 0  | 0  |
|      | 2009 |                                                                                                                         | 285 | 68  | 217 | 0  | 0   | 0   | 0   | 0  | 0   | 0                 | 0  | 0  |
|      | 2010 | 120 individuals ( 30♂90♀) were remove to C6                                                                             | 165 | 38  | 127 | 5  | 90  | 58  | 45  | 31 | 14  | 0                 | 31 | 14 |
|      | 2011 |                                                                                                                         | 210 | 69  | 141 | 1  | 23  | 0   | 0   | 0  | 0   | 0                 | 0  | 0  |
| C2   | 2001 | 15♂65♀ were introduced from area C;<br>15♂65♀ were introduced from area C1                                              | 160 | 30  | 130 | 17 | 238 | 199 | 114 | 34 | 80  | 0                 | 34 | 80 |
|      | 2002 |                                                                                                                         | 274 | 64  | 210 | 2  | 7   | 0   | 0   | 0  | 0   | 0                 | 0  | 0  |
|      | 2003 | 174 individuals ( 44♂130♀) were remove to C5<br>13 mature individuals ( 6♂7♀) were introduced from Anhui nature reserve | 113 | 26  | 87  | 16 | 334 | 203 | 137 | 39 | 98  | 0                 | 39 | 98 |
|      | 2004 |                                                                                                                         | 250 | 65  | 185 | 1  | 21  | 0   | 0   | 0  | 0   | 0                 | 0  | 0  |
|      | 2005 |                                                                                                                         | 250 | 65  | 185 | 1  | 9   | 0   | 0   | 0  | 0   | 0                 | 0  | 0  |
|      | 2006 | 65 individuals ( 25♂40♀) were remove to C6                                                                              | 185 | 40  | 145 | 18 | 141 | 58  | 46  | 25 | 21  | 0                 | NC | NC |
|      | 2007 |                                                                                                                         | 231 | 65  | 166 | 2  | 14  | 0   | 0   | 0  | 0   | 1♂1♀ born in 2006 | 0  | 0  |
|      | 2008 |                                                                                                                         | 229 | 64  | 165 | 2  | 14  | 0   | 0   | 0  | 0   | 0                 | 0  | 0  |
|      | 2009 | 80 individuals ( 20♂60♀) were remove to C6                                                                              | 229 | 64  | 165 | 1  | 4   | 0   | 0   | 0  | 0   | 0                 | 0  | 0  |
|      | 2010 |                                                                                                                         | 149 | 44  | 105 | 6  | 103 | 51  | 44  | 22 | 22  | 0                 | 22 | 22 |
| 2011 |      | 193                                                                                                                     | 66  | 127 | 1   | 16 | 0   | 0   | 0   | 0  | 0   | 0                 | 0  |    |
| C3   | 2003 | 162 individuals ( 30♂132♀) were introcued from C                                                                        | 175 | 36  | 139 | 5  | 107 | 61  | 45  | 34 | 11  | 0                 | 34 | 11 |
|      | 2004 |                                                                                                                         | 220 | 70  | 150 | 5  | 64  | 0   | 0   | 0  | 0   | 0                 | 0  | 0  |
|      | 2005 |                                                                                                                         | 220 | 70  | 150 | 5  | 33  | 0   | 0   | 0  | 0   | 0                 | 0  | 0  |
|      | 2006 | 120 individuals ( 30♂90♀) were remove to C6                                                                             | 100 | 40  | 60  | 11 | 207 | 101 | 89  | 29 | 60  | 0                 | NC | NC |
|      | 2007 |                                                                                                                         | 189 | 69  | 120 | 5  | 33  | 0   | 0   | 0  | 0   | 1♂ born in 2006   | 0  | 0  |
|      | 2008 |                                                                                                                         | 188 | 68  | 120 | 1  | 17  | 0   | 0   | 0  | 0   | 0                 | 0  | 0  |
|      | 2009 |                                                                                                                         | 188 | 68  | 120 | 3  | 24  | 0   | 0   | 0  | 0   | 0                 | 0  | 0  |
|      | 2010 | 90 individuals ( 30♂60♀) were remove to C6                                                                              | 98  | 38  | 60  | 4  | 71  | 40  | 37  | 15 | 22  | 0                 | 15 | 22 |
|      | 2011 |                                                                                                                         | 135 | 53  | 82  | 5  | 102 | 46  | 41  | 6  | 35  | 0                 | 6  | 35 |

|    |      |                                                                                                                           |      |     |     |    |     |     |     |     |     |                 |    |     |
|----|------|---------------------------------------------------------------------------------------------------------------------------|------|-----|-----|----|-----|-----|-----|-----|-----|-----------------|----|-----|
| C4 | 2003 | 64 individuals (39♂25♀) were introduced from C1;13 mature individuals (6♂7♀) were introduced from Anhui nature reserve    | 77   | 45  | 32  | 15 | 308 | 222 | 189 | 27  | 162 | 0               | 27 | 162 |
|    | 2004 |                                                                                                                           | 266  | 72  | 194 | 8  | 144 | 82  | 76  | 23  | 53  | 0               | NC | NC  |
|    | 2005 |                                                                                                                           | 342  | 95  | 247 | 3  | 17  | 0   | 0   | 0   | 0   | 0               | 0  | 0   |
|    | 2006 | 210 individuals (35♂175♀) were removed to C6                                                                              | 132  | 60  | 72  | 16 | 289 | 154 | 137 | 36  | 101 | 0               | NC | NC  |
|    | 2007 |                                                                                                                           | 269  | 96  | 173 | 8  | 75  | 0   | 0   | 0   | 0   | 0               | 0  | 0   |
|    | 2008 |                                                                                                                           | 269  | 96  | 173 | 5  | 55  | 0   | 0   | 0   | 0   | 0               | 0  | 0   |
|    | 2009 |                                                                                                                           | 269  | 96  | 173 | 0  | 0   | 0   | 0   | 0   | 0   | 0               | 0  | 0   |
|    | 2010 | 90 individuals (30♂60♀) were removed to C6                                                                                | 179  | 66  | 113 | 5  | 95  | 42  | 37  | 30  | 7   | 0               | 30 | 7   |
|    | 2011 |                                                                                                                           | 216  | 96  | 120 | 2  | 32  | 0   | 0   | 0   | 0   | 0               | 0  | 0   |
| C5 | 2003 | 174 individuals (44♂130♀) were introduced from C2; 15 mature individuals (7♂8♀) were introduced from Anhui nature reserve | 189  | 51  | 138 | 15 | 308 | 222 | 108 | 37  | 71  | 0               | 37 | 71  |
|    | 2004 |                                                                                                                           | 297  | 88  | 209 | 10 | 204 | 138 | 119 | 29  | 90  | 0               | NC | NC  |
|    | 2005 |                                                                                                                           | 416  | 117 | 299 | 0  | 0   | 0   | 0   | 0   | 0   | 0               | 0  | 0   |
|    | 2006 | 259 individuals (37♂222♀) were removed to C6                                                                              | 157  | 80  | 77  | 20 | 377 | 187 | 163 | 38  | 125 | 0               | NC | NC  |
|    | 2007 |                                                                                                                           | 320  | 118 | 202 | 11 | 53  | 0   | 0   | 0   | 0   | 0               | 0  | 0   |
|    | 2008 |                                                                                                                           | 320  | 118 | 202 | 3  | 20  | 0   | 0   | 0   | 0   | 0               | 0  | 0   |
|    | 2009 |                                                                                                                           | 320  | 118 | 202 | 6  | 118 | 0   | 0   | 0   | 0   | 0               | 0  | 0   |
|    | 2010 | 120 individuals (40♂80♀) were removed to C6                                                                               | 200  | 78  | 122 | 6  | 112 | 64  | 52  | 38  | 14  | 0               | 38 | 14  |
|    | 2011 |                                                                                                                           | 252  | 116 | 136 | 6  | 127 | 0   | 0   | 0   | 0   | 0               | 0  | 0   |
| C6 | 2006 | 766 individuals (171♂595♀) were introduced from area C, C1, C2, C3, C4, C5                                                | 766  | 171 | 595 | 35 | 692 | 559 | 486 | 97  | 389 | 0               | NC | NC  |
|    | 2007 |                                                                                                                           | 1252 | 268 | 984 | 31 | 568 | 443 | 401 | 101 | 300 | 1184 (301♂883♀) | NC | NC  |
|    | 2008 |                                                                                                                           | 469  | 68  | 401 | 15 | 276 | 144 | 99  | 43  | 56  | 0               | NC | NC  |
|    | 2009 |                                                                                                                           | 568  | 111 | 457 | 6  | 144 | 47  | 38  | 24  | 14  | 0               | NC | NC  |
|    | 2010 |                                                                                                                           | 1186 | 305 | 881 | 4  | 51  | 23  | 19  | 4   | 15  | 0               | NC | NC  |
|    | 2011 |                                                                                                                           | 1205 | 309 | 896 | 13 | 251 | 84  | 69  | 31  | 38  | 0               | NC | NC  |

## Supplementary table S2

The calculated sex-age structure of the Chinese alligator (*Alligator sinensis*) sub-population in areas C and C1

The data in the table represent the number of individuals.

| Area | Year | Total | Male |     |     |      |       | Female |     |      |      |       |
|------|------|-------|------|-----|-----|------|-------|--------|-----|------|------|-------|
|      |      |       | <=2  | 3~6 | 7~9 | >=10 | Total | <=2    | 3~7 | 8~10 | >=11 | Total |
| C    | 1984 | 11    | 0    | 0   | 0   | 3    | 3     | 0      | 0   | 0    | 8    | 8     |
|      | 1985 | 21    | 2    | 0   | 0   | 3    | 5     | 8      | 0   | 0    | 8    | 16    |
|      | 1986 | 41    | 4    | 0   | 0   | 3    | 7     | 26     | 0   | 0    | 8    | 34    |
|      | 1987 | 142   | 19   | 2   | 0   | 3    | 24    | 103    | 7   | 0    | 8    | 118   |
|      | 1988 | 81    | 7    | 4   | 0   | 3    | 14    | 33     | 26  | 0    | 8    | 67    |
|      | 1989 | 129   | 9    | 10  | 0   | 3    | 22    | 44     | 55  | 0    | 8    | 107   |
|      | 1990 | 197   | 20   | 11  | 0   | 3    | 34    | 96     | 59  | 0    | 8    | 163   |
|      | 1991 | 235   | 19   | 17  | 2   | 3    | 41    | 87     | 99  | 0    | 8    | 194   |
|      | 1992 | 233   | 6    | 27  | 4   | 5    | 42    | 38     | 145 | 0    | 8    | 191   |
|      | 1993 | 244   | 5    | 25  | 10  | 5    | 45    | 37     | 138 | 16   | 8    | 199   |
|      | 1994 | 242   | 4    | 25  | 9   | 7    | 45    | 18     | 128 | 45   | 6    | 197   |
|      | 1995 | 241   | 0    | 21  | 15  | 9    | 45    | 0      | 142 | 49   | 5    | 196   |
|      | 1996 | 241   | 0    | 9   | 21  | 15   | 45    | 0      | 102 | 73   | 21   | 196   |
|      | 1997 | 160   | 0    | 5   | 18  | 8    | 31    | 0      | 46  | 58   | 25   | 129   |
|      | 1998 | 243   | 15   | 4   | 15  | 12   | 46    | 68     | 37  | 65   | 27   | 197   |
|      | 1999 | 243   | 15   | 0   | 9   | 22   | 46    | 68     | 18  | 64   | 47   | 197   |
|      | 2000 | 243   | 0    | 15  | 5   | 26   | 46    | 0      | 68  | 46   | 83   | 197   |
|      | 2001 | 163   | 0    | 15  | 4   | 12   | 31    | 0      | 68  | 37   | 27   | 132   |
|      | 2002 | 237   | 13   | 15  | 0   | 16   | 44    | 61     | 68  | 18   | 46   | 193   |
|      | 2003 | 75    | 3    | 3   | 0   | 8    | 14    | 11     | 18  | 0    | 32   | 61    |
| 2004 | 247  | 31    | 3    | 3   | 8   | 45   | 141   | 29     | 0   | 32   | 202  |       |
| 2005 | 247  | 31    | 3    | 3   | 8   | 45   | 141   | 11     | 18  | 32   | 202  |       |
| 2006 | 164  | 0     | 19   | 3   | 8   | 30   | 0     | 106    | 8   | 20   | 134  |       |
| 2007 | 261  | 16    | 19   | 0   | 11  | 46   | 81    | 106    | 8   | 20   | 215  |       |
| 2008 | 258  | 16    | 16   | 3   | 11  | 46   | 78    | 106    | 0   | 28   | 212  |       |
| 2009 | 258  | 0     | 32   | 3   | 11  | 46   | 0     | 173    | 11  | 28   | 212  |       |
| 2010 | 178  | 0     | 6    | 9   | 8   | 26   | 0     | 113    | 11  | 28   | 152  |       |
| 2011 | 289  | 19    | 6    | 6   | 11  | 45   | 92    | 48     | 76  | 23   | 244  |       |

---

|    |      |     |    |    |   |    |    |     |     |    |    |     |
|----|------|-----|----|----|---|----|----|-----|-----|----|----|-----|
|    | 1997 | 81  | 0  | 0  | 6 | 8  | 14 | 0   | 0   | 42 | 25 | 67  |
|    | 1998 | 135 | 33 | 0  | 2 | 12 | 47 | 21  | 0   | 40 | 27 | 88  |
|    | 1999 | 177 | 56 | 0  | 0 | 14 | 70 | 40  | 0   | 20 | 47 | 107 |
|    | 2000 | 177 | 23 | 33 | 0 | 14 | 70 | 19  | 21  | 0  | 67 | 107 |
|    | 2001 | 97  | 0  | 41 | 0 | 14 | 55 | 0   | 0   | 0  | 42 | 42  |
|    | 2002 | 120 | 14 | 41 | 0 | 14 | 69 | 9   | 0   | 0  | 42 | 51  |
|    | 2003 | 69  | 14 | 9  | 0 | 13 | 36 | 9   | 0   | 0  | 24 | 33  |
| C1 | 2004 | 144 | 33 | 23 | 0 | 13 | 69 | 42  | 9   | 0  | 24 | 75  |
|    | 2005 | 144 | 33 | 14 | 9 | 13 | 69 | 42  | 9   | 0  | 24 | 75  |
|    | 2006 | 115 | 0  | 27 | 0 | 13 | 40 | 0   | 51  | 0  | 24 | 75  |
|    | 2007 | 285 | 28 | 27 | 0 | 13 | 68 | 142 | 51  | 0  | 24 | 217 |
|    | 2008 | 285 | 28 | 27 | 0 | 13 | 68 | 142 | 51  | 0  | 24 | 217 |
|    | 2009 | 285 | 0  | 55 | 0 | 13 | 68 | 0   | 184 | 9  | 24 | 217 |
|    | 2010 | 165 | 0  | 25 | 0 | 13 | 38 | 0   | 103 | 0  | 24 | 127 |
|    | 2011 | 210 | 31 | 25 | 0 | 13 | 69 | 14  | 103 | 0  | 24 | 141 |

---
